# Supplementary material for: Characterization of culturable microbiota associated with the skin of amphibians (Anura) in the southern Andes Mountains of Ecuador
Source: Research Square preprint supplement (doi:10.21203/rs.3.rs-5921108/v1), 2025-04-02
Supplement: Supplementary file 1 [file 37643e7f469902066172d515.docx]

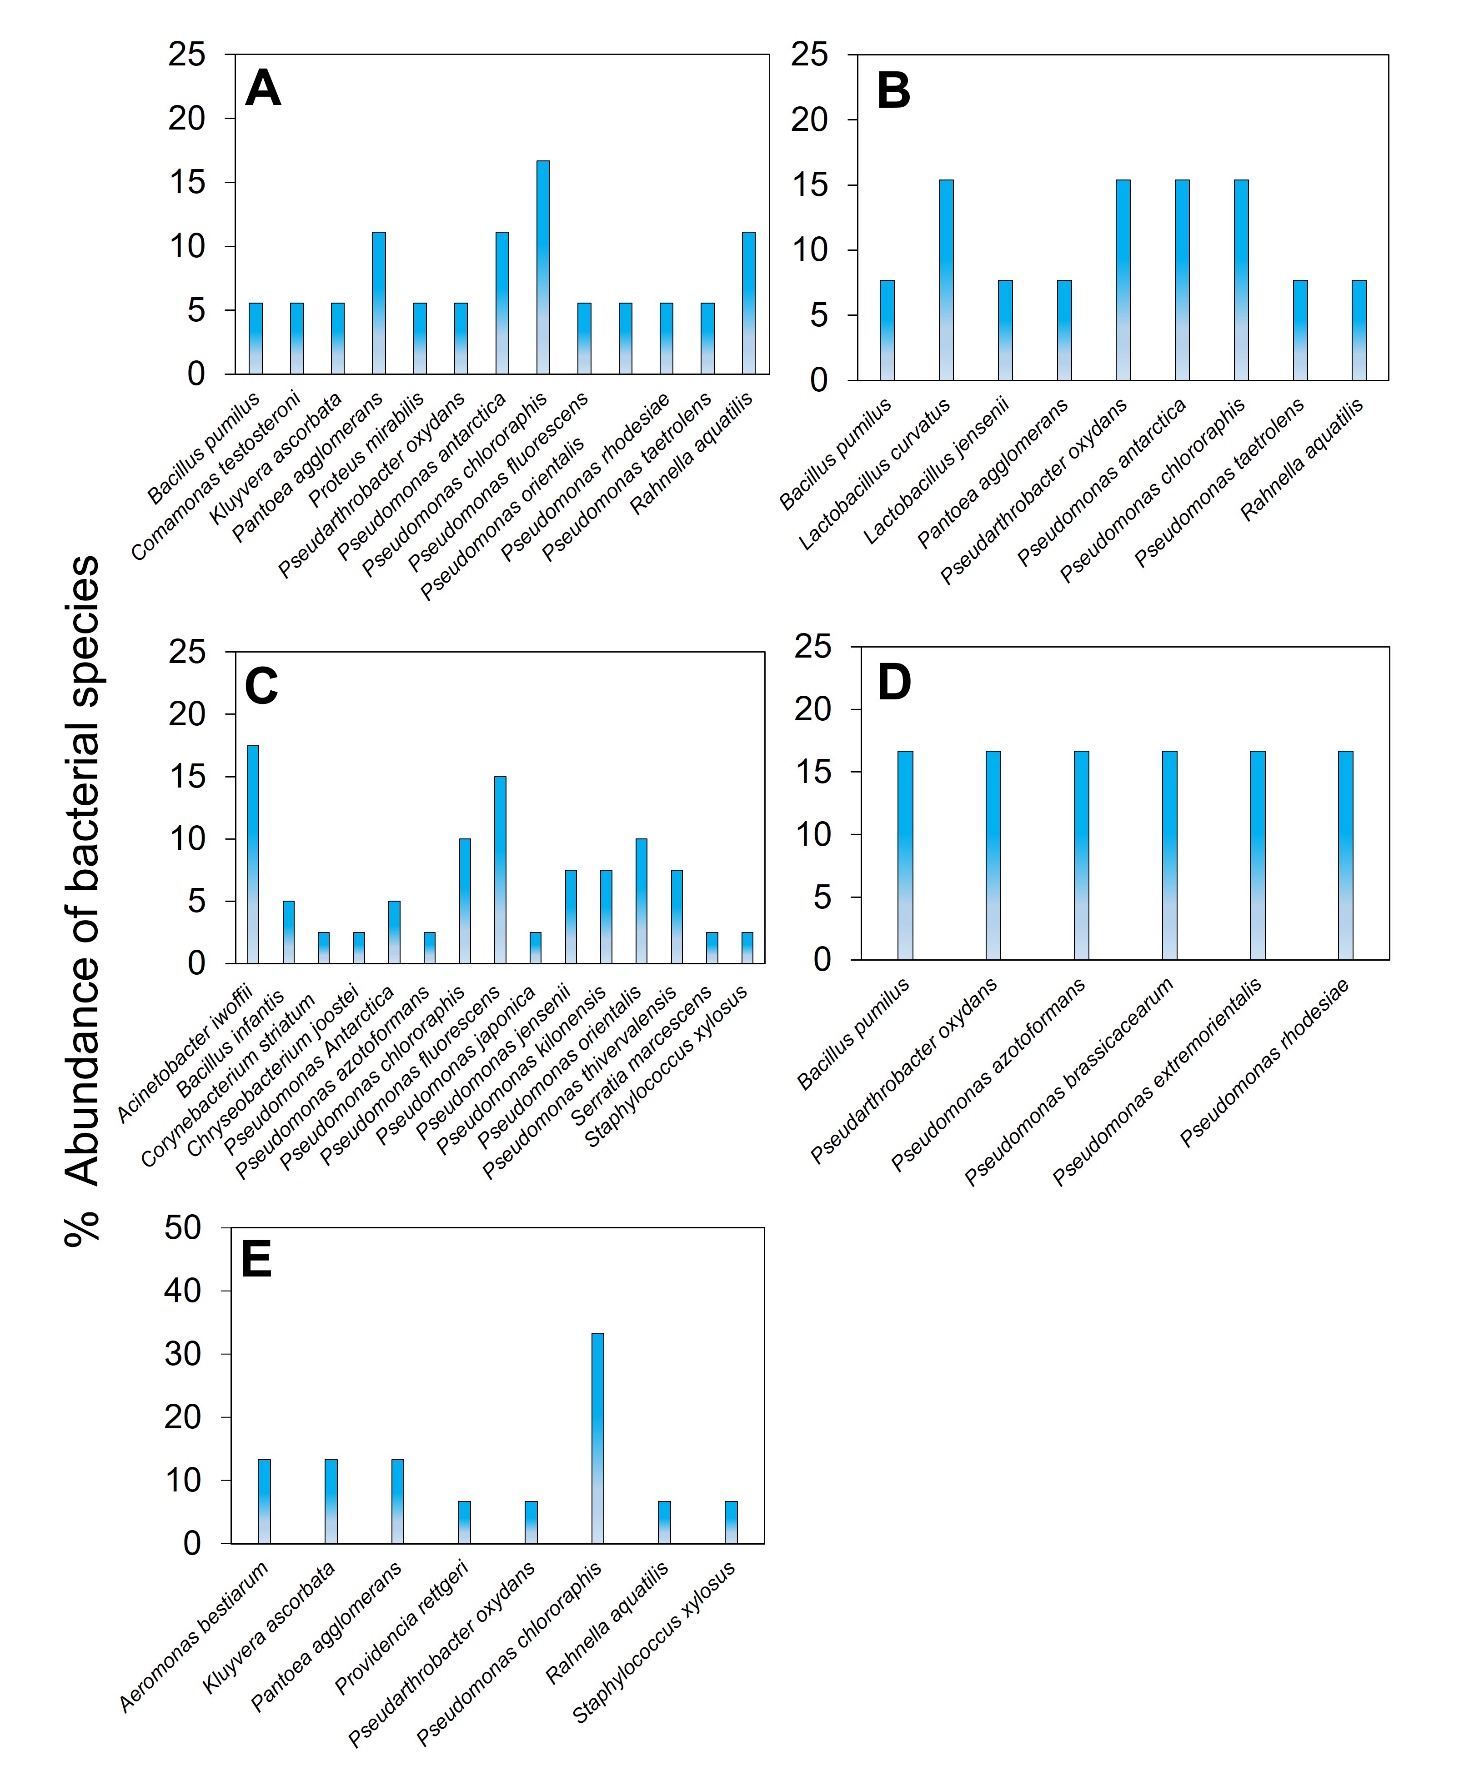


**Fig. Suplemental 1** Abundances of bacterial spp. obtained from anuran spp. in skin samples collected in the Ecuadorian provinces of: **(A)** Zamora Chinchipe, **(B)** Loja, **(C)** Cañar, **(D)** Azuay and **(E)** Morona Santiago.


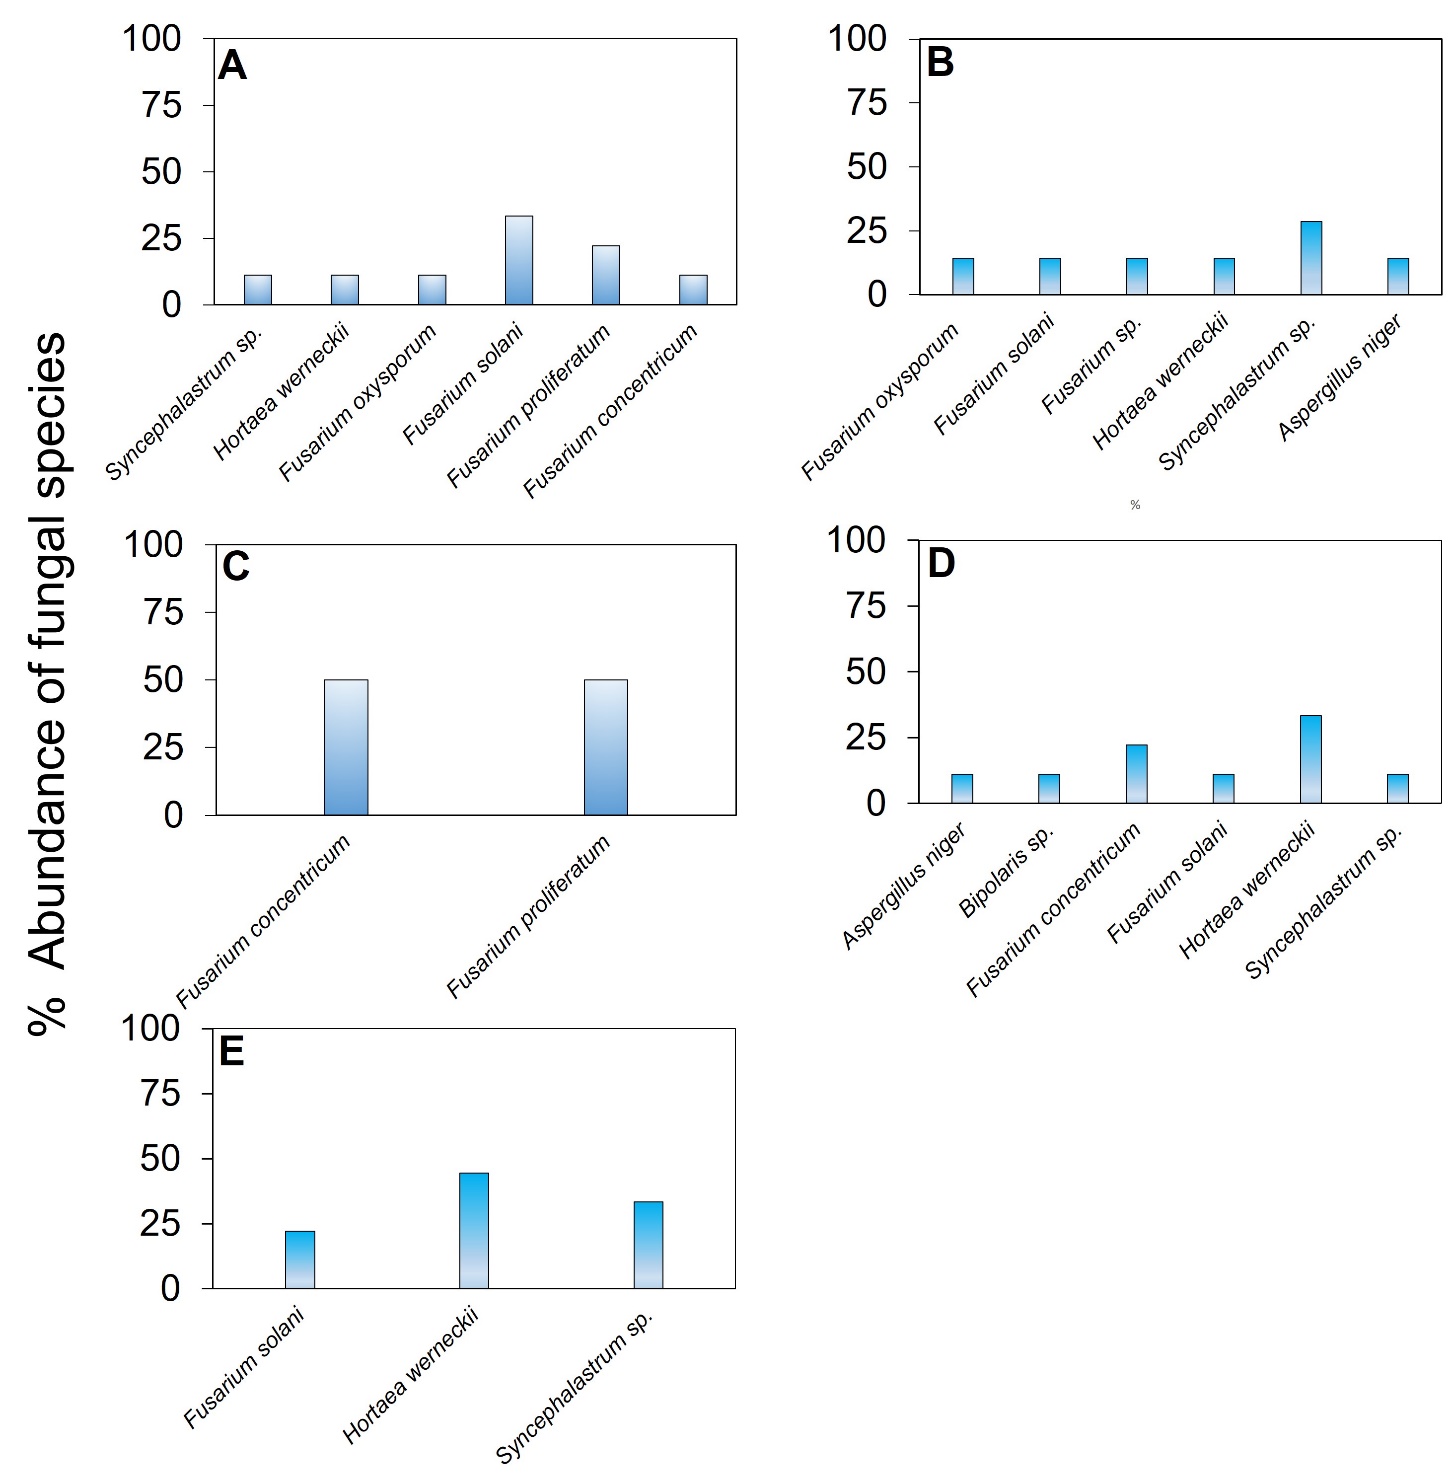


**Fig. Suplemental 2** Abundances of fungal species on anuran skin collected in the Ecuadorian provinces of: **(A)** Zamora Chinchipe, **(B)** Loja, **(C)** Cañar, **(D)** Azuay and **(E)** Morona Santiago.
